# Supplementary material
Source: PubMed Central journal article supplement (PMC2797241)
Supplement: supp_M109.030312_jbc.M109.030312-1.pdf [file supp_M109.030312_jbc.M109.030312-1.pdf]

### Supplementary data

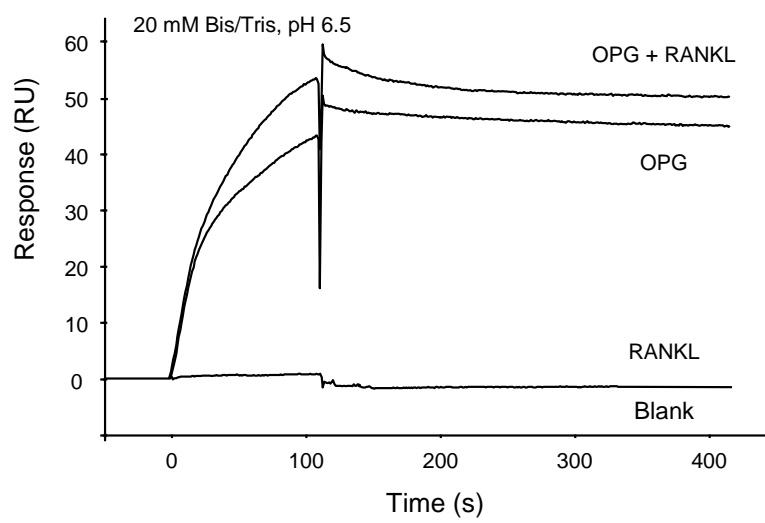

#### **OPG binds to immobilized-vWF chip in contrast to RANKL**

Experimental conditions: OPG (4nM), RANKL (10nM), pH 6.5. OPG was incubated with RANKL for 2 hours prior to the injection.
